# Supplementary material
Source: Springer Nature journal article supplement (https://www.springermedizin.de/resource/supplementary/12889_2013_6286_MOESM2_ESM.pdf/9499800)
Supplement: MOESM2 [file 9499800]

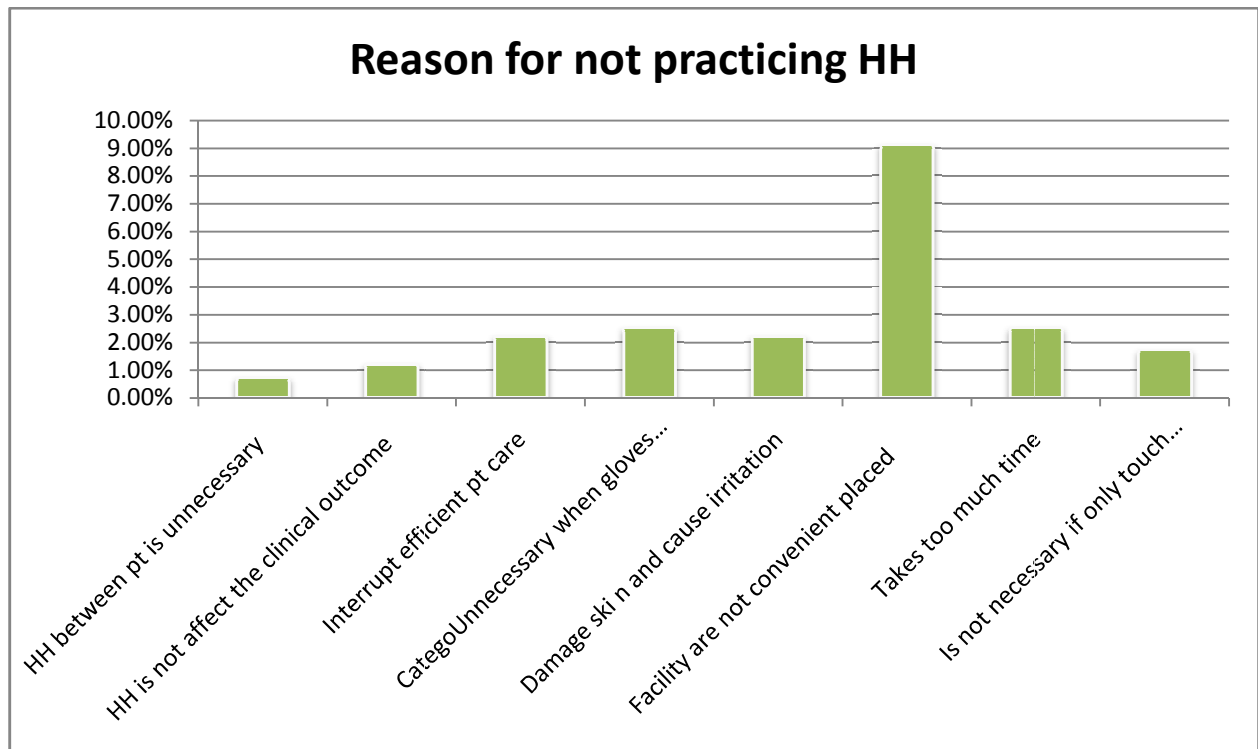

**Figure - Respondents' reasons for not practicing hand hygiene in Gondar University Hospital [GUH], Gondar, North West Ethiopia, 2013**
